# Supplementary material for: Metabonomic analysis of HIV-infected biofluids
Source: Royal Society of Chemistry journal article supplement (doi:10.1039/c2mb25318f), 2012-10-09
Supplement: c2mb25318f.pdf [file c2mb25318f.pdf]

## LIST OF ABBREVIATIONS

|                  |                                                |
|------------------|------------------------------------------------|
| $\beta$          | Beta                                           |
| $\omega$         | Omega                                          |
| AIDS             | Acquired Immunodeficiency Syndrome             |
| ATP              | Adenosine Triphosphate                         |
| $^1\text{H-NMR}$ | Proton Nuclear magnetic resonance spectroscopy |
| MS               | Mass spectrometry                              |
| HIV              | Human Immunodeficiency Virus Type-1            |
| HAART            | Highly Active Antiretroviral Therapy           |
| CD4              | Cluster of differentiation 4                   |
| NRTI's           | Nucleoside Reverse Transcriptase Inhibitors    |
| NNRTI's          | Non-Nucleoside Reverse Transcriptase Inhibitor |
| ART              | Antiretroviral Treatment                       |
| LDL-p            | Low Density Lipoprotein particle               |
| mtDNA            | mitochondrial Deoxyribonucleic Acid            |
| IR               | Insulin Resistance                             |
| PI               | Protease Inhibitor                             |
| PCA              | Principal Component Analysis                   |
| ANOVA            | Analysis of Variance                           |
| LDA              | Linear Discriminant Analysis                   |
| GC               | Gas Chromatography                             |

|                   |                                                 |
|-------------------|-------------------------------------------------|
| LC                | Liquid Chromatography                           |
| SIV               | Simian Immunodeficiency Virus                   |
| VLDL-p            | Very Low Density Lipoprotein particle           |
| HDL-p             | High Density Lipoprotein particle               |
| CVD               | Cardiovascular Disease                          |
| CHD               | Coronary Heart Disease                          |
| OPLS              | Orthogonal Projections to Latent Structures     |
| CSF               | Cerebrospinal fluid                             |
| SHY               | Statistical Heterospectroscopy                  |
| MRS               | Magnetic Resonance Spectroscopy                 |
| NADH              | Nicotinamide Adenine Dinucleotide Dehydrogenase |
| FADH <sub>2</sub> | Flavin Adenine Dinucleotide Dehydrogenase       |
| ADP               | Adenosine Diphosphate                           |
| O <sub>2</sub>    | Oxygen                                          |
| ROS               | reactive oxygen species                         |
| TNF               | Tumor Necrosis Factor                           |
| IL-6              | Interleukin 6                                   |
| SREBP-1           | Sterol-regulatory Element-Binding Protein-1     |
| C/EBP $\alpha$    | CCAAT-Enhancer-Binding Protein alpha            |
